# Supplementary material for: Meta-analysis of human cancer microarrays reveals GATA3 is integral to the estrogen receptor alpha pathway
Source: Mol Cancer. 2008 Jun 4;7:49. doi: 10.1186/1476-4598-7-49 (PMC2430971; doi:10.1186/1476-4598-7-49)
Supplement: Additional file 2 — ERα Oncomine meta-analysis. Meta-analysis results from 21 Oncomine studies shown. Coexpressing genes with ERα are shown with a cutoff of 3 studies (14% of the 21 studies). [file 1476-4598-7-49-S2.xls]

## Sheet: Sheet1
ESR1	1	NK4	0.33	MLPH	0.24	VAV3	0.19	IRF8	0.19	CD14	0.19	SNX1	0.14	OAS2	0.14	ICA1	0.14	DKFZp434L142	0.14	C20orf35	0.14	Oncomine Studies Used
GATA3	0.48	NAT1	0.33	MGC52057	0.24	UBE2L6	0.19	IRF1	0.19	CCNG2	0.19	SMARCD3	0.14	NR1D1	0.14	HSPC121	0.14	DHRS2	0.14	C2	0.14
LAF4	0.43	MUC1	0.33	LYZ	0.24	UBD	0.19	IL7R	0.19	CCND1	0.19	SLPI	0.14	NFATC4	0.14	HNRPU	0.14	DHCR24	0.14	C1orf38	0.14	Wang_Breast
BCL2	0.43	MS4A7	0.33	LIPA	0.24	TYROBP	0.19	IL16	0.19	CCL4L	0.19	SLC7A7	0.14	NF2	0.14	HMGCS2	0.14	DDX58	0.14	C17orf28	0.14	vantVeer_Breast
XBP1	0.38	MB	0.33	LILRB3	0.24	TRD@	0.19	IGLL1	0.19	CCL3	0.19	SLC7A2	0.14	NEDD4L	0.14	HLA-F	0.14	DACH1	0.14	C17orf27	0.14	Zhao_Breast
TFF3	0.38	KIAA0303	0.33	LILRB2	0.24	TPD52	0.19	IGLC1	0.19	CCL18	0.19	SLC27A2	0.14	NDST1	0.14	HLA-DOA	0.14	CYP2B7P1	0.14	C14orf45	0.14	Sotiriou_Breast_2
SLC39A6	0.38	ITGB2	0.33	LGMN	0.24	TPBG	0.19	IFI44L	0.19	CACNA2D2	0.19	SLC16A6	0.14	NCF1	0.14	HCG4P6	0.14	CYBRD1	0.14	BZW1	0.14	Sorlie_Breast
IFI30	0.38	IRS1	0.33	LCP1	0.24	TMC4	0.19	IFI35	0.19	CACNA1D	0.19	SLC15A2	0.14	MX2	0.14	GSTM5	0.14	CYB5	0.14	BTRC	0.14	Sorlie_Breast_2
HLA-DRB1	0.38	IFIT2	0.33	LAPTM5	0.24	THRAP2	0.19	ICAM3	0.19	CA12	0.19	SLA	0.14	MST1	0.14	GSTM4	0.14	CTSB	0.14	BTN3A2	0.14	Gruvberger_Breast
HLA-DQB1	0.38	HLA-DRB5	0.33	KRT18	0.24	TFAP2B	0.19	HPN	0.19	C9orf116	0.19	SIT	0.14	MSP	0.14	GSTM2	0.14	CTNND2	0.14	BTD	0.14	Perou_Breast
TNFSF10	0.38	HLA-DPB1	0.33	KIAA0040	0.24	TARP	0.19	HLA-DQB2	0.19	C1QG	0.19	ShrmL	0.14	MSN	0.14	GRK5	0.14	CST7	0.14	BMP5	0.14	West_Breast
SERPINA3	0.38	HLA-C	0.33	JMJD2B	0.24	SULT2B1	0.19	HLA-DQA2	0.19	BIN2	0.19	SFRS5	0.14	MS4A6A	0.14	GPNMB	0.14	CSF2RB	0.14	BHLHB2	0.14	vandeVijver_Breast
SCNN1A	0.38	GFRA1	0.33	ITPR1	0.24	STK39	0.19	HLA-DQA1	0.19	BCAS1	0.19	SEC14L2	0.14	MMP12	0.14	GPHN	0.14	CROT	0.14	BCMP11	0.14	Glinsky_Prostate
RARRES3	0.38	FOXA1	0.33	INPP4B	0.24	STARD10	0.19	HDAC11	0.19	B7	0.19	SALL2	0.14	MGC42367	0.14	GPD1L	0.14	CRIP2	0.14	BCL2A1	0.14	Singh_Prostate
RAB31	0.38	FCER1G	0.33	IL6ST	0.24	SLC9A3R1	0.19	HCP5	0.19	AR	0.19	RUNX1	0.14	MGC19764	0.14	GM2A	0.14	CRIP1	0.14	BARX1	0.14	Chen_Gastric
PARP14	0.38	ERBB3	0.33	IL10RA	0.24	SLC22A5	0.19	H2AFV	0.19	APOL3	0.19	RUNDC1	0.14	MGC12815	0.14	GLB1	0.14	CORO1A	0.14	AZGP1	0.14	Leung_Gastric
LRBA	0.38	DTX4	0.33	IFITM1	0.24	SLAMF8	0.19	GZMK	0.19	APOE	0.19	RPS29	0.14	MGC11242	0.14	GJB1	0.14	COL8A1	0.14	ATP7B	0.14	Linn_Sarcoma
IGF1R	0.38	DNAJC12	0.33	IFIT1	0.24	SERPINA6	0.19	GZMA	0.19	ANXA9	0.19	RIC3	0.14	MEOX1	0.14	GALNT10	0.14	CNTNAP1	0.14	ASTN2	0.14	Garber_Lung
HLA-DPA1	0.38	CD53	0.33	HLA-DRA	0.24	SEMA3C	0.19	GSTM3	0.19	ANGPTL1	0.19	RET	0.14	MEIS4	0.14	GAGE2	0.14	CLSTN2	0.14	ARID1A	0.14	Cario_Leukemia
HLA-DMA	0.38	CD4	0.33	GIMAP5	0.24	SELL	0.19	GRIA2	0.19	ALDH4A1	0.19	REPS2	0.14	MARCO	0.14	G1P2	0.14	CIP29	0.14	ARHGEF16	0.14	Lossos_Lymphoma
HCLS1	0.38	BTN3A3	0.33	GBP1	0.24	SAMSN1	0.19	GREB1	0.19	ALCAM	0.19	REG1A	0.14	MAPK8IP2	0.14	FMO5	0.14	CHI3L1	0.14	ARHGDIB	0.14	Shyamsundar_Normal
FLJ20366	0.38	BTN3A1	0.33	G1P3	0.24	RPL21	0.19	GPR160	0.19	AGR2	0.19	RBKS	0.14	MALT1	0.14	FLT1	0.14	CGI-49	0.14	ARHGAP8	0.14	Whitney_Normal
FCGR2B	0.38	BIRC3	0.33	FCGR2A	0.24	RNF110	0.19	GCC2	0.19	ACOX2	0.19	RBBP8	0.14	MAL2	0.14	FLJ39639	0.14	CGI-119	0.14	ARHGAP25	0.14	Lapointe_Prostate
FBP1	0.38	WFDC2	0.24	EVI2B	0.24	RNASE4	0.19	GBP2	0.19	ZNFN1A1	0.14	RALGPS2	0.14	M6PRBP1	0.14	FLJ35429	0.14	CDW52	0.14	APOC2	0.14
FAAH	0.38	WARS	0.24	EPS8L3	0.24	RHOB	0.19	FYB	0.19	ZMYND10	0.14	RALGPS1	0.14	LRP2	0.14	FLJ23467	0.14	CDH1	0.14	APOC1	0.14	in bold is overlap with
CTSS	0.38	UNG2	0.24	ENPP1	0.24	RERG	0.19	FPGS	0.19	ZKSCAN1	0.14	RALB	0.14	LOC92017	0.14	FLJ23186	0.14	CD9	0.14	APOBEC3C	0.14	GATA3 chosen studies
CSF1R	0.38	UGCG	0.24	DOCK2	0.24	PTE2B	0.19	FOXC1	0.19	WWP1	0.14	RAI2	0.14	LOC51161	0.14	FLJ22938	0.14	CD79A	0.14	ANK3	0.14
COX6C	0.38	TNFAIP3	0.24	DNALI1	0.24	PRSS23	0.19	FLNB	0.19	WDFY3	0.14	RAB26	0.14	LOC400451	0.14	FLJ13710	0.14	CD74	0.14	AKR7A2	0.14
CELSR2	0.38	TNFAIP2	0.24	CYP51A1	0.24	PLAT	0.19	FLJ21062	0.19	VSIG4	0.14	RAB17	0.14	LOC257106	0.14	FLJ10980	0.14	CD59	0.14	AIF1	0.14
ACADSB	0.38	TM4SF13	0.24	CTSL	0.24	PIK3CD	0.19	FLJ13052	0.19	VIPR1	0.14	PTPRN2	0.14	LOC255743	0.14	FLJ10647	0.14	CD3G	0.14	ADRA2A	0.14
TLE3	0.33	STEAP2	0.24	ChGn	0.24	NRIP1	0.19	FER1L3	0.19	VCAM1	0.14	PSME2	0.14	LOC222171	0.14	FLJ10116	0.14	CD37	0.14	ACP5	0.14
TFF1	0.33	STEAP	0.24	CD8A	0.24	NMI	0.19	EVL	0.19	URP2	0.14	PSMB8	0.14	LOC143381	0.14	FGL2	0.14	CD1C	0.14	ABLIM3	0.14
TAP1	0.33	STC2	0.24	CD48	0.24	MTL5	0.19	EVI2A	0.19	UGDH	0.14	PSMB10	0.14	LOC130576	0.14	FGFR3	0.14	CD163	0.14	ABCA1	0.14
STAT1	0.33	SP110	0.24	CCR1	0.24	MRPS30	0.19	ERBB4	0.19	TTLL4	0.14	PREX1	0.14	LGALS9	0.14	FGFR1	0.14	CCL2	0.14
SLC40A1	0.33	SEMA3B	0.24	CCL5	0.24	MMP9	0.19	EML2	0.19	TSGA2	0.14	PON3	0.14	LCP2	0.14	FCGR3B	0.14	CCL19	0.14
SLC22A18	0.33	RNASE6	0.24	C1QB	0.24	MAPT	0.19	ELOVL5	0.19	TP53I11	0.14	PLEKHG3	0.14	LAP3	0.14	FAM38B	0.14	CCL13	0.14
SIAH2	0.33	RHOH	0.24	C10orf116	0.24	MAGED2	0.19	DOCK8	0.19	TNFRSF1B	0.14	PLA2R1	0.14	KIAA1223	0.14	F13A1	0.14	CAST	0.14
SERPINA5	0.33	QDPR	0.24	BST2	0.24	LU	0.19	CYP2B6	0.19	TJP3	0.14	PIK3C3	0.14	KCNAB2	0.14	ERBB2	0.14	CASP1	0.14
SELENBP1	0.33	PTPRT	0.24	BF	0.24	LSP1	0.19	CYFIP2	0.19	THEDC1	0.14	PIK3AP1	0.14	JAK2	0.14	EPB41L5	0.14	CaMKIINalpha	0.14
SCUBE2	0.33	PTPRC	0.24	BBC3	0.24	LRIG1	0.19	CYBB	0.19	TCEAL1	0.14	PHC2	0.14	ITGA3	0.14	ELF3	0.14	C7orf6	0.14
RAC2	0.33	PARD6B	0.24	B2M	0.24	LOC51760	0.19	CXXC5	0.19	STOM	0.14	PGR	0.14	ISGF3G	0.14	EDN1	0.14	C7	0.14
RABEP1	0.33	NKG7	0.24	ASAH1	0.24	LGALS3BP	0.19	CXCR4	0.19	STH	0.14	PGK1	0.14	INHBB	0.14	ECM1	0.14	C6orf85	0.14
PTGER3	0.33	NCF2	0.24	APOBEC3G	0.24	LCK	0.19	CXCL9	0.19	STATIP1	0.14	PBX1	0.14	INCA	0.14	DUSP5	0.14	C5orf18	0.14
PLEK	0.33	MYB	0.24	AGTR1	0.24	KYNU	0.19	CTSZ	0.19	ST18	0.14	PAG	0.14	ILT7	0.14	DUSP4	0.14	C4A	0.14
PDCD4	0.33	MX1	0.24	ABCA3	0.24	KIAA0882	0.19	CTSC	0.19	SSH3	0.14	PACAP	0.14	IL2RG	0.14	DPYD	0.14	C3AR1	0.14
OAS1	0.33	MSX2	0.24	13CDNA73	0.24	KAL1	0.19	CISH	0.19	SPG20	0.14	P2RY2	0.14	IGJ	0.14	DOK1	0.14	C2orf27	0.14
NPY1R	0.33	MSTP9	0.24	ZC3HDC1	0.19	ITGA4	0.19	CD68	0.19	SNX24	0.14	OSBPL6	0.14	IFITM2	0.14	DLG5	0.14	C2orf23	0.14
